# Supplementary material for: Hsa_circ_0079474 facilitates epithelial-mesenchymal transition in intrauterine adhesion via miR-630/YAP1 axis
Source: Research Square preprint supplement (doi:10.21203/rs.3.rs-3767908/v1), 2024-01-25
Supplement: Supplementary file 1 [file 8a06071c638186ddfdcafa26.docx]

Table S1. The sequences of the primers.

|  | Sequences(5‘to 3’) |
| --- | --- |
| hsa_circ_0079474 (divergent) | F: ATCTGTCCAGTGGTACTGGT  R: GACAGGTAACAGACAATGTCC |
| hsa_circ_0079474 (convergent) | F: TCCCTCTTGCATCAAGACCT  R: CACCAAACACAATGCAGTCC |
| hsa_circ_0132015 (divergent) | F: GCCTTGGAATACCAGCAAGA  R: CCAGATACACAGCATCATCA |
| DGKB | F: AAAAGGAACACTGATGTCATGC  R: ACAGTTTTGTGGCACTTATCAC |
| GAPDH | F: GAAGGTGAAGGTCGGAGTC  R: GAAGATGGTGATGGGATTTC |
| U6 | F: CTCGCTTCGGCAGCACA  R: AACGCTTCACGAATTTGCGT |
| miR-630 | RT: GTCGTATCCAGTGCAGGGTCCGA  GGTATTCGCACTGGATACGACACCTTC  F: GCGCGAGTATTCTGTACCAGG  R: AGTGCAGGGTCCGAGGTATT |
| miR-892a | RT: GTCGTATCCAGTGCAGGGTCCGAG  GTATTCGCACTGGATACGACCTACGC  F: CGCGCACTGTGTCCTTTCT  R: AGTGCAGGGTCCGAGGTATT |
| miR-935 | RT: GTCGTATCCAGTGCAGGGTCCGAG  GTATTCGCACTGGATACGACGCGGTA  F: GCCAGTTACCGCTTCCGC  R: AGTGCAGGGTCCGAGGTATT |
| CK-18 | F: AATGGGAGGCATCCAGAACGAGAA  R: GGGCATTGTCCACAGTATTTGCGA |
| E-cadherin | F: CATGAGTGTCCCCCGGTATC  R: CAGTATCAGCCGCTTTCAGA |
| Vimentin | F: CCCTCACCTGTGAAGTGGAT  R: TCCAGCAGCTTCCTGTAGGT |
| α-SMA | F: GACAATGGCTCTGGGCTCTGTAA  R: ATGCCATGTTCTATCGGGTACTTCA |
| YAP1 | F: GCAGTTGGGAGCTGTTTCTC  R: CTGTCGAAGATGCTGAGCTG |
| miRNA-NC | CUUCCCUGGUACAGAAUACUUU |
| miR-630 mimic | AGUAUUCUGUACCAGGGAAGGU |
| miR-630 inhibitor | ACCUUCCCUGGUACAGAAUACU |
| miR-630 agomir | AGUAUUCUGUACCAGGGAAGGU |
| miR-630 antagomir | (mA)*(mC)*(mC)(mU)(mU)(mC)(mC)(mC)(mU)(mG)(mG)(mU)(mA)(mC) (mA)(mG)(mA)(mA)*(mU)*(mA)*(mC)*(mU) |
| hsa_circ_0079474-siRNA-chol | (mG)(mG)(mU)AC(mU)(mG)(mG)(mU)C(mU)(mG)A(mG)AA(mU)(mG)A(dT)(dT) |
| siRNA-NC | UUCUCCGAACGUGUCACGUTT |
| siRNA-NC-chol | (mC)*(mU)*(mU)(mC)(mC)(mC)(mU)(mG)(mG)(mU)(mA)(mC)(mA)(mG) (mA)(mA)(mU)(mA)*(mC)*(mU)*(mU)*(mU) |
|  |  |
