# Supplementary figures and images for: Hsa_circ_0079474 facilitates epithelial-mesenchymal transition in intrauterine adhesion via miR-630/YAP1 axis
Source: Research Square preprint supplement (doi:10.21203/rs.3.rs-3767908/v1), 2024-01-25

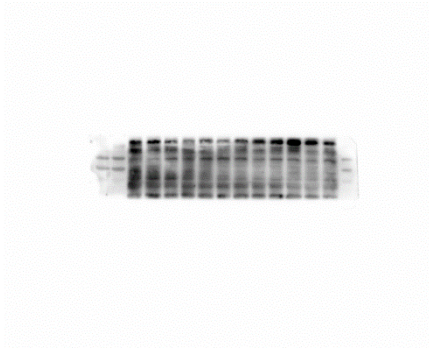

YAP1

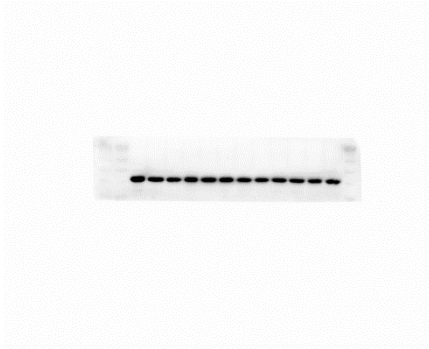

GAPDH

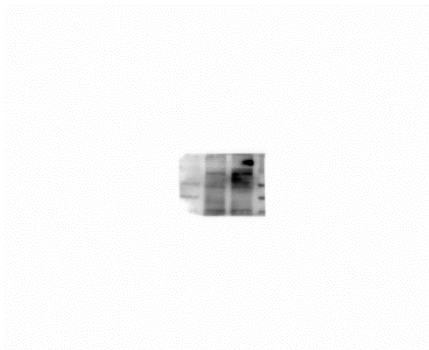

TGF-YAP1-1

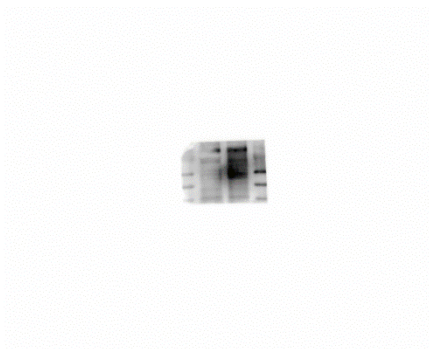

TGF-YAP1-2

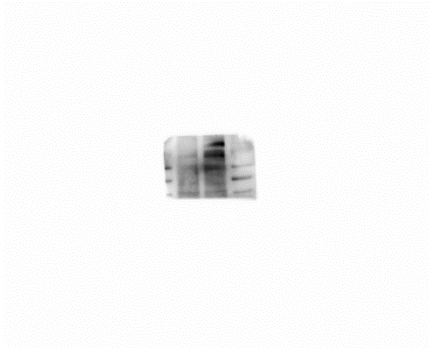

TGF-YAP1-3

Supplement: Supplementary file 1 [file e5adf12c32071f57341ea6b6.pdf]
